# Supplementary material for: Thiamine tetrahydrofurfuryl disulfide promotes voluntary activity through dopaminergic activation in the medial prefrontal cortex
Source: PubMed Central journal article supplement (PMC6041333; doi:10.1038/s41598-018-28462-2), 2018-07-11
Supplement: 41598_2018_28462_MOESM1_ESM.pdf [file 41598_2018_28462_MOESM1_ESM.pdf]

1 **Scientific Reports**

2  
3 **Thiamine tetrahydrofurfuryl disulfide promotes voluntary**  
4 **activity through dopaminergic activation in the medial**  
5 **prefrontal cortex**

6  
7 **Masato Saiki<sup>1,#</sup>, Takashi Matsui<sup>1,2,#</sup>, Mariko Soya<sup>1,#</sup>, Tomomi**  
8 **Kashibe<sup>1</sup>, Takeru Shima<sup>1</sup>, Takeshi Shimizu<sup>3</sup>, Takehiro Naruto<sup>4</sup>,**  
9 **Takahito Kitayoshi<sup>4</sup>, Kouji Akimoto<sup>4</sup>, Shinji Ninomiya<sup>4</sup>, and Hideaki**  
10 **Soya<sup>1,2,\*</sup>**

11  
12 *<sup>1</sup>Laboratory of Exercise Biochemistry and Neuroendocrinology, Faculty of Health and Sport*  
13 *Sciences, University of Tsukuba, Tsukuba, Ibaraki, Japan, 305-8574; <sup>2</sup> Sports Neuroscience*  
14 *Division, Advanced Research Initiative for Human High Performance (ARIHHP), University*  
15 *of Tsukuba; Tsukuba, Ibaraki, Japan, 305-8574; <sup>3</sup>Sports Research and Development Core,*  
16 *University of Tsukuba, Tsukuba, Ibaraki, Japan, 305-8574; <sup>4</sup>Takeda Consumer Healthcare*  
17 *Company Limited, Tokyo, Japan, 100-0005. #These authors contributed equally to this work.*

18  
19 **\*Correspondence**

20 Hideaki Soya, Ph.D.

21 E-mail: [soya.hideaki.gt@u.tsukuba.ac.jp](mailto:soya.hideaki.gt@u.tsukuba.ac.jp)

22 Tel/Fax: +81-29-853-2620

Supplementary Information

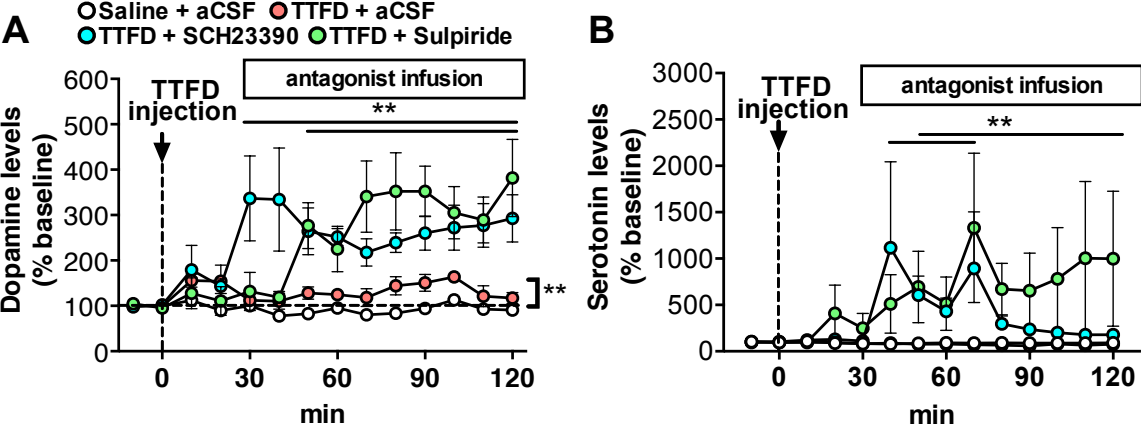

1 **Figure S1 Dopamine D1 and D2 receptor antagonists increase dopamine and serotonin**  
 2 **release after TTFD injection. (A) Extracellular dopamine levels. (B) Extracellular serotonin**  
 3 **levels. \*\* $P < 0.01$  versus saline + aCSF group (two-way ANOVA with Bonferroni's post hoc**  
 4 **tests).**
